1 **Alexidine dihydrochloride has broad spectrum activities against diverse fungal**  
2 **pathogens.**

3 Zeinab Mamouei<sup>1</sup>, Abdullah Alqarihi<sup>1</sup>, Shakti Singh<sup>1</sup>, Shuying Xu<sup>3</sup>, Michael K. Mansour<sup>3</sup>,  
4 <sup>4</sup>, Ashraf S Ibrahim<sup>1, 2</sup>, Priya Uppuluri<sup>1,2\*</sup>

5

6 **Running title:** Alexidine dihydrochloride has pan-antifungal activity

7

8 <sup>1</sup>Los Angeles Biomedical Research Institute at Harbor-University of California at Los  
9 Angeles (UCLA) Medical Center, Torrance, CA

10 <sup>2</sup>David Geffen School of Medicine at UCLA, Los Angeles, California, United States of  
11 America

12 <sup>3</sup>Division of Infectious Diseases, Massachusetts General Hospital, Boston, MA.

13 <sup>4</sup>Harvard Medical School, Boston, MA

14

15

16

17

18

19

20

21

22

23

24

25

26 \*Corresponding author

27 [puppuluri@labiomed.edu](mailto:puppuluri@labiomed.edu)

28 Abstract word count: 175

29 Manuscript word count: 4267

30 **Abstract.**

31 Invasive fungal infections due to *Candida albicans*, *Aspergillus fumigatus* and  
32 *Cryptococcus neoformans*, constitute a substantial threat to hospitalized,  
33 immunocompromised patients. Further, the presence of drug-recalcitrant biofilms on  
34 medical devices, and emergence of drug-resistant fungi such as *Candida auris*,  
35 introduce treatment challenges with current antifungal drugs. Worse, currently there is  
36 no approved drug capable of obviating preformed biofilms which increases the chance  
37 of infection relapses. Here, we screened a small molecule Prestwick Chemical Library,  
38 consisting of 1200 FDA approved off-patent drugs, against *C. albicans*, *C. auris* and *A.*  
39 *fumigatus*, to identify those that inhibit growth of all three pathogens. Inhibitors were  
40 further prioritized for their potency against other fungal pathogens, and their ability to kill  
41 preformed biofilms. Our studies identified the bis-biguanide Alexidine dihydrochloride  
42 (AXD), as a drug with the highest antifungal and anti-biofilm activity against a diverse  
43 range of fungal pathogens. Finally, AXD significantly potentiated the efficacy of  
44 fluconazole against biofilms, displayed low mammalian cell toxicity, and eradicated  
45 biofilms growing in mice central venous catheters *in vivo*, highlighting its potential as a  
46 pan-antifungal drug.

47 **Importance.**

48 The prevalence of fungal infections has seen a rise in the past decades due to  
49 advances in modern medicine leading to an expanding population of device-associated  
50 and immunocompromised patients. Furthermore, the spectrum of pathogenic fungi has  
51 changed, with the emergence of multi-drug resistant strains such as *C. auris*. High  
52 mortality related to fungal infections point to major limitations of current antifungal

53 therapy, and an unmet need for new antifungal drugs. We screened a library of  
54 repurposed FDA approved inhibitors to identify compounds with activities against a  
55 diverse range of fungi, in varied phases of growth. The assays identified Alexidine  
56 dihydrochloride (AXD) to have pronounced antifungal activity including against  
57 preformed biofilms, at concentrations lower than mammalian cell toxicity. AXD  
58 potentiated the activity of fluconazole and amphotericin B against *Candida* biofilms *in*  
59 *vitro*, and prevented biofilm growth *in vivo*. Thus AXD has the potential to be developed  
60 as a pan-antifungal, anti-biofilm drug.

61

## 62 **Introduction.**

63 Fungal pathogens responsible for invasive fungal infections (IFIs) are a leading cause of  
64 human mortality, killing approximately one and a half million people every year, despite  
65 treatment with antifungal drugs (1). Of concern, the current incidence of fungal-related  
66 deaths is reported to be even higher than mortality due to tuberculosis or malaria (2). A  
67 vast majority of IFIs result from species belonging to *Cryptococcus*, *Candida* or  
68 *Aspergillus* (3). However, fungi such as molds other than *Aspergillus*, and non-*albicans*  
69 *Candida* species including the multi-drug resistant pathogen *C. auris*, are becoming  
70 increasingly frequent and difficult to treat (4). Furthermore, other IFIs such as those due  
71 to Mucorales cause highly angioinvasive and tissue-destructive infections which in  
72 many cases have mortality rates close to 100% (2).

73 The challenge in treatment of IFIs is directly linked to an ever expanding population of  
74 immunocompromised patients requiring modern medical interventions, and a paucity of

75 currently approved antifungal agents (5, 6). Indwelling medical devices infected with  
76 fungi, develop biofilms that are notoriously resistant to all classes of antifungal drugs,  
77 and serve as a reservoir of infectious cells with direct access to the vasculature (7, 8).  
78 Current therapeutic armamentarium for IFIs is sparse, including only three classes of  
79 antifungal agents: polyenes, azoles, and echinocandins. These drugs have drawbacks  
80 including significant limitations in spectrum of activity, human toxicity and emergence of  
81 drug resistance, thereby underscoring a need for development of new antifungal agents  
82 (9, 10).

83 To fulfil this unmet need, we employed a high throughput screening assay (HTS), to  
84 screen and characterize FDA (U.S. Food and Drug Administration)-approved, off patent  
85 library drugs for their abilities to kill/inhibit three of the most invasive and drug-resistant  
86 human pathogenic fungi, *C. albicans*, *C. auris* and *A. fumigatus*. This assay allowed us  
87 to identify core fungicidal molecules against all the three pathogens. One of the leading  
88 compounds identified was a bis-biguanide dihydrochloride called alexidine  
89 dihydrochloride (AXD). AXD is an anti-cancer drug that targets a mitochondrial  
90 tyrosine phosphatase PTPMT1 in mammalian cells, and causes mitochondrial  
91 apoptosis (11). We found that AXD not only inhibited planktonic growth, but also  
92 prevented biofilm formation, as well as killed biofilms formed by a variety of drug  
93 resistant and susceptible isolates of diverse fungal organisms. Further, when used in  
94 combination, AXD reduced the MIC of fluconazole and amphotericin B, and rendered  
95 them efficacious against drug resistant *C. albicans* biofilms. Finally, anti-biofilm property  
96 of AXD was also recapitulated in an *in vivo* mouse central venous catheter model of *C.*  
97 *albicans* biofilm formation. Overall, our studies warrant the further development of AXD

98 as a pan-fungal anti-biofilm drug, which could be used in combination therapeutics  
99 against diverse fungal pathogens.

100

## 101 **Results and discussion**

### 102 **High throughput screening (HTS) for identification of antifungal molecules.**

103 We used a HTS assay to test the ability of a commercially available, small molecule  
104 library containing 1233 FDA approved compounds (New Prestwick Chemical [NPW]  
105 Library). We reckoned that repositioning existing off-patent drugs with known human  
106 safety and bioavailability profiles, can accelerate the antifungal drug-discovery process  
107 without undergoing the arduous FDA approval process. These compounds were  
108 screened to identify a core set of inhibitors and fungicidals against *C. albicans*, *A.*  
109 *fumigatus* and *C. auris*. The former two fungi represent two of the top four fungal  
110 pathogens causing IFIs with 40-70% mortality rates (3). *C. auris* is a newly emerging  
111 fungus that represents a serious global health threat due to its multi-drug resistant  
112 properties (12). We used cell viability as a parameter for prioritizing the broad spectrum  
113 FDA-approved molecules as lead drugs for developing pan-fungal therapeutics. The  
114 purpose was to first identify a core set of molecules that could inhibit a diverse collection  
115 of fungi spanning different genus and species, under planktonic growth conditions.

116 HTS was performed in a 384-well plate screening format, where the NPW library was  
117 screened against planktonic yeast or spore suspensions of the three fungal organisms,  
118 at a single concentration of 10  $\mu$ M. The spectrum of activity of these drugs was  
119 compared to clinically used azole drugs (fluconazole or voriconazole) at a concentration

120 ranging from 0.03 to 32 µg/ml. MIC of drugs were determined in agreement with the  
121 CLSI M27-A3 (for yeast) and M38-A2 (for filamentous fungi) reference standards for  
122 antifungal susceptibility testing (13, 14). After three days of incubation at 37°C, turbidity  
123 of the wells (OD600) was measured and molecules displaying >50% reduction in  
124 turbidity compared to control non-drug treated wells (MIC50) were considered as  
125 primary “hits”. Z' factor, was calculated as a parameter of HTS screening quality, and  
126 an average Z' factor of 0.75 was computed for our assays (a value of >0.5 represents  
127 an excellent quality of HTS)(15).

128 From this hit-list, a core set of molecules that inhibited planktonic growth of all three  
129 fungi as identified by >50% growth inhibition measured by MIC were identified and  
130 shortlisted. *C. albicans* was sensitive to fluconazole at concentration <0.125-0.25 µg/ml,  
131 as has been reported previously (16), while consistent with its drug resistant nature, *C.*  
132 *auris* was resistant to fluconazole with MIC >16 µg/ml (Table 2). *A. fumigatus*  
133 succumbed to voriconazole at 0.25 µg/ml, similar to previously reported anti-fungal drug  
134 susceptibility studies (16). Recently, Siles *et al.* investigated the ability of NPW to  
135 specifically inhibit *C. albicans* biofilms, and revealed 38 pharmacologically active agents  
136 against the fungus (17). While our study also identified a number of molecules  
137 individually inhibiting the three fungi, respectively (Table. 1), only the following six  
138 compounds were successful at inhibiting all three organisms: chloroxin, thimerosal,  
139 alexidine dihydrochloride, haloprogin, clioquinol and butenafine hydrochloride (Table 1).  
140 NPW contains a number of antifungal drugs, such as imidazoles', triazoles and polyene  
141 class of drugs. *C. auris* was by far the most resistant fungus, inert against the azoles

142 and polyenes in the library. The six molecules were further evaluated for their ability to  
143 curtail biofilm formation as well as kill pre-formed biofilms developed by the three fungi.

144 **Secondary assays for determination of anti-biofilm activity.** Wells with *C. albicans*,  
145 *C. auris* and *A. fumigatus* were either treated with inhibitors at the time of yeast/spore  
146 inoculation (start of biofilm initiation), or allowed to grow without drugs for 48 h to allow  
147 biofilm development (mature biofilm). This assay was performed in a 96-well microtiter  
148 plate assay, as previously reported by us (18). For the effect on formation of biofilm, all  
149 six inhibitors could inhibit biofilm formation in the three fungal organisms, as adjudged  
150 by a significant decrease in turbidity of the media in the wells 48 h following incubation  
151 with the drugs (data not shown). However, only two drugs, alexidine dihydrochloride and  
152 thimerosal could significantly kill 80% of mature biofilm community at the tested  
153 concentration of <10  $\mu$ M (Fig 1A and **S1A**). We chose to focus our attention to studying  
154 alexidine dihydrochloride (AXD), since it was more attractive with respect to drug  
155 development, having indications for use as an antibacterial and antiplaque agent and  
156 with limited side effects (19-21).

157 **Dose response assays of AXD.** AXD was first evaluated in planktonic and biofilm  
158 dose response assays, and further tested for its ability to inhibit growth of other fungal  
159 pathogens including drug resistant clinical isolates, a number of non-*albicans Candida*  
160 spp, and members of the Mucorales family. The results for this study are described in  
161 Table. 2 which lists the fungal strains used for evaluation of the efficacy of AXD, under  
162 three different growth conditions – planktonic, biofilm inhibition and preformed biofilms,  
163 compared to the MIC of the control azole antifungal drugs. For example, AXD displayed  
164 activity against most *Candida* spp; MIC values of  $\leq 1.5$   $\mu$ g/ml were observed for all

165 isolates tested under planktonic conditions, with the exception of *C. parapsilosis* and *C.*  
166 *krusei*. Interestingly, AXD also displayed striking activity against clinically relevant  
167 fluconazole-resistant *Candida* isolates: *C. albicans* (CA2, CA6 and CA10), *C. glabrata*  
168 (CG2, CG5), *C. parapsilosis* (CP5) and *C. auris* (CAU-09, CAU-03). Furthermore, the  
169 MIC values of AXD against *C. neoformans* was comparable to the MIC values for  
170 fluconazole.

171 In case of filamentous fungi, low AXD MIC<sub>50</sub> values of 1.5-3 µg/ml was observed for  
172 all filamentous fungi (Mucorales and *Aspergillus* spp., plates read at 48 h), including the  
173 molds *L. corymbifera* and *S. apiospermum* (read at 72 h) that have poor outcome with  
174 current clinically available antifungal drugs (22). Inhibition of planktonic growth by AXD,  
175 monitored microscopically, revealed a complete inhibition of filamentation or  
176 proliferation of the imaged fungi (**Fig 1B**). Of particular importance was the finding that  
177 AXD was able to decimate at low concentrations (1.5-6 µg/ml), mature biofilms of  
178 *Candida*, *Cryptococcus* and *Aspergillus* spp. that are known to be resistant to almost all  
179 classes of antifungal drugs (Table 2, also see **S2** for AXD activity on *Candida* spp.). In  
180 fact, at 10 fold lower concentrations (150 ng/ml) of planktonic MICs', AXD could inhibit  
181 lateral yeast formation and biofilm dispersal in *C. albicans* (**Fig 1C**). Dispersal of lateral  
182 yeast cells from a biofilm biomass is the link between contaminated catheters and  
183 disseminated candidiasis (8, 23). Inhibition of dispersal with just nano-molar levels of  
184 AXD can help seal the biofilm reservoir and curtail further proliferation and robustness  
185 of a biofilm.

186 Alexidine dihydrochloride is a bis(biguanide) in which the common 2-ethylhexyl chain  
187 has been attached to each biguanide unit and the two units are linked by a 1,6-



188 hexanediamine chain (**S3A**). This compound initially identified for its anti-bacterial  
189 properties, is also found as an inducer of mitochondrial dysfunction and apoptosis (11,  
190 24). AXD has been proposed in several studies as an anti-plaque agent, mouthwash,  
191 and with potential to be used in endodontic treatment to eliminate biofilms (19, 20, 25).  
192 These reports, along with our present findings, serve as precedents for the development  
193 of AXD as an anti-biofilm agent. Another bisbiguanide with structural similarity to AXD,  
194 metformin, has recently been shown to have antifungal activity (and synergistic  
195 potentiation of clinically used antifungal drugs) against *C. glabrata*, albeit only at  
196 physiologically inapt high concentrations (26). AXD, on the other hand is active even at  
197 levels as low as 0.75 µg/ml, against an array of fungal species in our current study. In  
198 fact, AXD has been reported to have activity against the fungus *C. neoformans*, by  
199 targeting phospholipases (27). Whether specific inhibition of fungal phospholipases is  
200 the cause of AXD's antifungal activity against a spectrum of pathogenic fungi, is  
201 unknown and remains to be explored in future studies.

#### 202 **Mammalian cell cytotoxicity assays and synergy of AXD with fluconazole.**

203 Considering that AXD displayed enhanced efficacy against fungal organisms, we  
204 evaluated the extent of its cell toxicity (CC50) to mammalian cells. Results showed that  
205 AXD resulted in 50% killing of HUVECs and lung epithelial cells, at concentrations 5-10  
206 fold higher than the MIC required to kill planktonically growing fungal pathogens (CC50  
207 >7.37 µg/ml vs planktonic MIC50 of 0.73-1.5 µg/ml) (**Fig. 2A, B**). Previous studies have  
208 reported similar cytotoxicity levels of AXD against various other cell lines (19, 27, 28).  
209 We further tested the toxicity of AXD to a human bone-marrow derived macrophage cell  
210 line to understand its effect on the immune cells. AXD displayed a slightly higher toxicity

211 to the macrophages compared to the mammalian tissue cell lines, with a CC50 of over 5  
212  $\mu\text{g/ml}$  (**Fig 2C**). A similar study was also done to test the impact of AXD toxicity on HL60  
213 monocyte proliferation. HL60 cells stained with CFSE were treated with varying  
214 concentrations of AXD, or the control PMA (phorbol 12-myristate 13-acetate) as a  
215 positive stimulant that induces cellular proliferation. Inhibition of cellular proliferation  
216 corresponds to toxicity, and the concentration of AXD that could prevent early cell  
217 division in HL60 cells was examined. As expected cells stimulated by PMA showed  
218 proliferation, while those treated with the highest dose of AXD (10  $\mu\text{g/ml}$ ) did not divide.  
219 AXD at 5  $\mu\text{g/ml}$  prevented cell division in the human bone marrow derived HL60 cells  
220 (**S3B**). This level of toxicity matched the macrophage CC50 value. We note that  
221 concentrations detrimental to host cells are at least 3-4 fold higher than AXD levels  
222 required to inhibit planktonic cells of many different fungi, including *C. albicans*. These  
223 moderately low cytotoxicity of the FDA approved drug pave the way to a potential  
224 repurposing of AXD as an antifungal agent, and warrant its further development into a  
225 compound with higher efficacy, bioavailability and less toxicity.

226 This inhibitory potential was further highlighted in our studies evaluating synergistic  
227 action of AXD in combination with fluconazole, against mature *C. albicans* biofilms.  
228 Fluconazole is completely inert against *C. albicans* biofilms, with an MIC50 of >250  
229  $\mu\text{g/ml}$  {this study and (7, 29, 30)}. When used together, AXD at 1.25  $\mu\text{g/ml}$ , strikingly  
230 reduced the MIC50 of fluconazole from >256  $\mu\text{g/ml}$  to clinically relevant 1  $\mu\text{g/ml}$  (**Fig**  
231 **2D**), providing an FIC index of 0.42, that indicated a synergistic interaction (30). These  
232 results further emphasize AXD's prospect as an anti-biofilm agent, especially due to its

233 ability to lower MICs of fluconazole, highlighting the possibility of bringing a biofilm-  
234 redundant drug back into clinical use.

235 **Inhibition of biofilm *in vivo* by AXD.** Our studies showed that AXD could arrest  
236 growth and kill biofilm cells formed by various *Candida* species, *C. neoformans* and *A.*  
237 *fumigatus* in *in vitro* assays. We next examined the ability of AXD to decimate  
238 preformed biofilms in an *in vivo* model. For this study we chose to focus on biofilm  
239 formation by *C. albicans*, since a murine biofilm model has been well established in this  
240 fungus and used for testing the effects of established and new antifungal agents (31).  
241 The effect of the drugs on the 24 h old biofilms growing in the jugular vein catheters of  
242 mice was visualized microscopically, which revealed significantly lower density of the  
243 biofilms in catheters treated with AXD and caspofungin, versus the control untreated  
244 catheters (**Fig 3A**). In fact, fungal CFU determination revealed that AXD inhibited 67%  
245 of fungal biofilm growth and viability, compared to the control untreated biofilms (**Fig**  
246 **3B**). As expected, caspofungin (an antifungal drug known to be hyperactive against *C.*  
247 *albicans* biofilms) decimated >90% of the biofilm community growing within the  
248 catheters. On the other hand, fluconazole (a drug with enhanced activity against  
249 planktonic fungi, but with no effectiveness against biofilm cells) was found to reduce  
250 biofilms by only 30% (**Fig 3B**). Overall our data shows that AXD can inhibit biofilm  
251 growth *in vivo*. A better understanding of the pharmacokinetics/pharmacodynamics of  
252 AXD could be invaluable in assessing its utility as a systemic antifungal drug, especially  
253 in a disseminated mouse model of fungemia.

254 In summary, our HTS identified alexidine dihydrochloride to have profound activity  
255 against various growth forms of fungi: planktonic, biofilm and biofilm dispersal. AXD was

256 fungicidal to a number of different pathogenic fungi including common as well as  
257 emerging drug resistant pathogens. The fact that AXD retains its activity against azole  
258 resistant clinical isolates indicates its potential use in recalcitrant fungal infections.  
259 Importantly, AXD reduces the MIC of fluconazole-a clinically used first line antifungal  
260 drug, ironically considered dispensable for biofilm treatment, thereby pointing to its  
261 extended utility as an anti-biofilm combination drug. Perhaps the most intriguing activity  
262 of AXD was seen against Mucorales including *Rhizopus*, a species that leads to  
263 devastating infections and very poor outcomes in patients, despite conventional  
264 antifungal treatment. Furthermore, the drug was also potent against those fungi that are  
265 therapeutically unmanageable in clinics with current antifungal agents such as *L.*  
266 *corymbifera* and *S. apiospermum*. Future studies will focus on the mechanism of action  
267 of AXD at a molecular level, and evaluate its feasibility as a pan-antifungal drug to  
268 combat infections in different clinical settings.

## 269 **Material and Methods**

270 **Strains, media and culture conditions:** The following fungal strains were used in this  
271 study: *C. albicans* strain SC5314 which is a human clinical isolate recovered from a  
272 patient with generalized candidiasis (32), several clinical isolates of *Candida* spp.  
273 received from the Fungus Testing Laboratory at the University of Texas Health Science  
274 Center at San Antonio: fluconazole-sensitive *C. albicans* CA1, CA4, and fluconazole-  
275 resistant *C. albicans* CA6, CA10, *C. glabrata* fluconazole-sensitive CG1, CG3 and  
276 fluconazole-resistant CG2. *C. parapsilosis* CP1, CP2, CP3, *C. neoformans* CN1, CN2,  
277 CN3, and *A. fumigatus* AF1, AF2, AF3. Some *Candida* strains were also obtained from  
278 the Division of Infectious Disease, Massachusetts General Hospital, Boston, MA:

279 fluconazole-resistant strains of *C. albicans* CA2, *C. parapsilosis* CP4, CP5, *C. krusei*  
280 CK, and *C. tropicalis* CT2). The two *C. auris* isolates CAU-03 and CAU-09 were a kind  
281 gift from Dr. Shawn Lockhart, Centers of Disease Control (CDC), and the filamentous  
282 fungi including *Rhizopus delemar* 99.880 and *Rhizopus oryzae* 99.892, *L. corymbifera*  
283 008049, *C. bertholletiae* 182, *M. circillenioides* 131 and *S. apiospermum* DI16-478 were  
284 a part of the fungal bank at Division of Infectious Diseases, Los Angeles Biomedical  
285 Research Center. All cultures were maintained by subculture on Yeast Peptone  
286 Dextrose media (YPD) at 37°C and stocks of these cultures stored in 20% glycerol at -  
287 80°C.

288 **HTS screening:** Screening was performed at the Molecular Screening Shared  
289 Resource facility, at University of California, Los Angeles. A total of 50 µl of 1x10<sup>4</sup>  
290 cells/ml fungal yeast cells (*C. albicans*, *C. auris*) or spores (*Aspergillus*) were  
291 suspended in RPMI-1640 supplemented with L-glutamine (Cellgro), buffered with 165  
292 mM morpholinepropanesulfonic acid (MOPS), and plated into individual 384-well plates  
293 using an automated Multidrop 384 system (Thermo LabSystems). The New Prestwick  
294 Chemical Library consisting of 1233 drugs was used to pin one compound per well at 10  
295 µM final concentration, using a Biomek FX liquid handler. Forty eight hours later the  
296 plates were scanned with a Flex Station II 384 well plate reader (Molecular Devices) to  
297 measure turbidity (OD600) of the wells. Molecules displaying >80% reduction in turbidity  
298 compared to control non-drug treated wells (MIC80) were considered as primary “hits”.  
299 Compounds commonly inhibiting all three fungal organisms were prioritized for  
300 planktonic dose response assays and for their activity against biofilm growth.

301 **Dose response assays:** Dose response assay of AXD against planktonically grown  
302 fungi was determined in agreement with the CLSI M27-A3 (for yeast) and M38-A2 (for  
303 filamentous fungi) reference standards for antifungal susceptibility testing (13, 14). Each  
304 drug was used in the concentration range of 0.19 µg/ml to 24 µg/ml, and the MIC of  
305 AXD was compared to MIC of fluconazole, posaconazole or voriconazole, as controls.  
306 All strains described in Table 2 were tested at LA BioMedical Research Institute;  
307 however several of the *Candida* strains were also verified for their susceptibility to AXD  
308 independently at Massachusetts General Hospital. Inhibition of planktonic growth or  
309 filamentation due to drug treatment was also visualized and imaged using bright field  
310 microscopy. Microscopy was also used to directly visualize lateral yeast formation from  
311 planktonic *C. albicans* hyphae, or lateral yeast cells formed on the surface of the  
312 biofilms (dispersal) using microtiter plates.

313 **Biofilm growth and drug susceptibility testing:** Biofilms of *Candida* spp., *C.*  
314 *neoformans*, and *A. fumigatus* were developed in 96-well microtiter plates, and  
315 susceptibility of the biofilm cells to AXD or thimerosal was carried out as described  
316 previously (33, 34). Biofilms were initiated either in the presence or absence of the  
317 drugs, or the drugs were tested on 48 h pre-formed biofilms, for efficacy evaluation.  
318 Inhibition of biofilm growth was measured by a standard calorimetric assay XTT that  
319 measures metabolic activity of the biofilm cells (18). Absorbance at 490 nm was  
320 measured using an automated plate reader. Biofilms formed by several other *Candida*  
321 spp. were further studied for their susceptibility to AXD.

322 Potential of AXD for synergistic use with fluconazole against *C. albicans* biofilms was  
323 investigated using a checkerboard assay, where dilutions of fluconazole (0.25 to 250

324  $\mu\text{g/ml}$ ) and AXD (0.3 to 2  $\mu\text{g/ml}$ ) were examined alone and in combination. Biofilm killing  
325 was measured by XTT assay. Drug concentration associated with 50% reduction in  
326 optical density compared to the no-drug control wells ( $\text{EC}_{50}$ ) was determined. The  
327 fractional inhibitory concentration (FIC) was then calculated as follows:  $[(\text{EC}_{50} \text{ of drug A}$   
328  $\text{in combination})/(\text{EC}_{50} \text{ of drug A alone})] + [(\text{EC}_{50} \text{ of drug B in combination})/(\text{EC}_{50} \text{ of drug}$   
329  $\text{B alone})]$ . Values of  $\leq 0.5$  revealed synergy, those of  $>0.5$  but  $<2$  indicated no  
330 interaction, and those of  $>2$  were antagonistic (30).

331 **Mammalian cell toxicity assays:** Primary human umbilical vascular endothelial cells  
332 (HUVEC) and human lung carcinoma derived A549 epithelial cell lines were used to  
333 determine the cytotoxicity of AXD. HUVEC cells were isolated and propagated by the  
334 method of Jaffe *et al.* (35). The cells were grown in M-199 (Gibco, Grand Island, N.Y)  
335 supplemented with 10% fetal bovine serum, 10% defined bovine calf serum and 2 nM L-  
336 glutamine, with penicillin and streptomycin. Second or third-passage endothelial cells  
337 were grown on collagen matrix on 96-well microtiter plates. Treatment with AXD was  
338 conducted in M-199 medium.

339 A549 cells were purchased from the American Type Culture Collection and grown in  
340 Dulbecco's modified Eagle's medium (DMEM) supplemented with 10% fetal bovine  
341 serum. A549 cells ( $1.5 \times 10^5/\text{well}$ ) were used to seed 96-well plates and incubated at  
342  $37^\circ\text{C}$  in a humidified atmosphere containing 5%  $\text{CO}_2$  for 24 h. The medium was then  
343 removed by aspiration, and the cells were washed twice with phosphate-buffered saline.  
344 Treatment with AXD was conducted with DMEM supplemented with 1% FBS.  
345 Different concentrations of AXD in respected media were introduced into the cell lines,  
346 and incubated for 24 h at  $37^\circ\text{C}$  in 5%  $\text{CO}_2$ . The extent of cellular damage to both cell

347 lines, caused by AXD was quantified by a chromium release assay (36). Briefly,  
348 confluent mammalian cells were incubated overnight in respective media containing Na<sub>2</sub>  
349 <sup>51</sup>CrO<sub>4</sub> (6 µCi per well; ICN Biomedicals, Irvine, Calif.). The next day, the unincorporated  
350 tracer was aspirated and the wells were rinsed three times with warm HBSS. Two  
351 hundred µl of media containing various concentrations of AXD (ranging from 0.12-59  
352 µg/ml) was added to each well, and the plate was incubated for 24 h at 37°C in 5% CO<sub>2</sub>.  
353 At the end of the incubation, 100 µl of medium was gently aspirated from each well,  
354 after which the cells were lysed by the addition of 6 N NaOH. The lysed cells were  
355 aspirated, and the wells were rinsed twice with RadicWash (Atomic Products, Inc.,  
356 Shirley, N.Y.). These rinses were added to the lysed cells, and the <sup>51</sup>Cr activity of the  
357 medium and the cell lysates was determined. Control wells containing no drug were  
358 processed in parallel to measure the spontaneous release of <sup>51</sup>Cr. After corrections  
359 were made for the differences in the incorporation of <sup>51</sup>Cr in each well, the specific  
360 release of <sup>51</sup>Cr was calculated by the following formula: (2X experimental release – 2X  
361 spontaneous release)/ (total incorporation – 2X spontaneous release).

362 **Cytotoxicity to immune cells:** Wild-type C57Bl/6 primary bone marrow-derived  
363 macrophages were cultured by plating bone marrow cells in 50 ng/ml of M-CSF  
364 (Peprotech, Rocky Hill, NJ) in complete RPMI (RPMI 1640 with 2 mM L-glutamine, 10%  
365 heat-inactivated fetal bovine serum, and 1% penicillin-streptomycin) for 7 days, then  
366 counted and seeded at 1x10<sup>5</sup> in 100 µl of complete PRMI overnight to allow for  
367 adhesion.

368 To examine cytotoxicity of AXD, bone marrow-derived macrophages were incubated in  
369 varying concentrations of AXD for 24h and stained with DAPI (Invitrogen, Carlsbad, CA)



370 for viability assessment using an inverted epifluorescence microscope (Olympus IX70,  
371 Center Valley, PA) using 10X objective, with a X-cite 120 metal halide light source  
372 (EXFO, Mississauga, ON, Canada). Percent cell viability was determine using  $1 -$   
373 [DAPI-positive cells were divided by total cells by phase contrast] x 100.

374 AXD was also examined for its capacity to block proliferation of a human promyelocytic  
375 cell line, HL-60. Cells were stained with 2 mM CFSE (Carboxyfluorescein Succinimidyl  
376 ester) for 5 minutes and washed with 1X RPMI media three times. This dye is  
377 commonly used to measure cell proliferation; with each cell division the amount of  
378 CFSE is diluted in half, which can be observed via flow cytometry (37). After the  
379 staining, the cells were counted and adjusted at cell density of  $5 \times 10^6$  cells/ml and plated  
380 100  $\mu$ l/well in a round bottom 96-well plate. A two-fold serially diluted AXD was added in  
381 wells containing cells. The final drug concentration obtained was between 0.004 and 10  
382  $\mu$ g/ml. Drug-untreated and unstained cells in a number of wells were included as  
383 controls. Plates were incubated at 37°C for 48 hours to allow the cell proliferation. After  
384 48 hours, the cells were collected and acquired in flow cytometer. The unstained cells  
385 were used to gate the CFSE positive HL60 cells. The shift in the peak of CFSE+ HL60  
386 cells were considered proliferating cells.

387 ***In vivo* biofilm drug susceptibility.** A mouse central venous catheter infection model  
388 was used for biofilm studies as previously described (31). These *in vivo* experiments  
389 were approved by the Los Angeles Biomedical Research Institute, Harbor-UCLA-  
390 IACUC. Briefly, we used catheterized 8-week old C57BL/6 male mice, purchased from  
391 Charles River labs (Wilmington, MA), where the surgery was performed. The surgery  
392 involves insertion of a Silastic catheter into the jugular vein of the mice. Patency is

393 tested, and the catheter is filled with heparin lock solution and plug-sealed. Following  
394 receipt of the jugular vein catheterized mice, the catheters were instilled with 25  $\mu$ l of *C.*  
395 *albicans* inoculum of  $5 \times 10^6$  cells/ml (entire catheter volume) using a 23-gauge blunt-  
396 ended needle after removal of the plug and the lock solution (the plug will be put back in  
397 place after inoculation). Cells were allowed to develop biofilms for 24 h, after which the  
398 catheters were treated with 3  $\mu$ g/ml AXD for 48 h. Biofilms growing in replicate mice  
399 catheters were also subjected to fluconazole (250  $\mu$ g/ml) or caspofungin (0.125  $\mu$ g/ml),  
400 as comparative controls. The catheters were cut laterally and imaged under a phase  
401 contrast microscope to visualize the morphology of the cells growing within the  
402 catheters of the individual groups. Additionally, the distal 2 cm of the catheters were into  
403 small pieces, vortexed vigorously and homogenized for plating on to YPD plates for  
404 viability count measurements.

405 **Statistical methods:** All *in vitro* secondary assays were done in triplicate and repeated  
406 once. Experiments were conducted in a randomized fashion, and subjected to unpaired  
407 two-tailed t-tests and/or ANOVA with Kruskal-Wallis post-test to determine significance  
408 of results (for  $p \leq 0.05$ ). For *in vivo* studies, differences in catheter fungal burden  
409 between the four groups (6 mice per group), were presented as percent reduction in  
410 CFU in the individual drug treated groups compared to the control untreated mice. A two  
411 tailed t-test with a p-value of  $<0.05$  was considered significant.

412

413

## 414 **Acknowledgment**

415 We would like to thank Dr. Nathan Wiederhold, Director, Fungus Testing Laboratory,  
416 University of Texas Health Sciences Center at San Antonio, for providing us with  
417 several clinical isolates of fungi used in this study. These studies were funded by a  
418 grant from the National American Heart Association #16SDG30830012 to PU. ASI is  
419 supported by Public Health Service grant from the National Institutes of Allergy and  
420 Immunology R01 AI063503.

## 421 **Figure legend:**

422 **Figure 1. Inhibition of biofilm growth, *C. albicans* biofilm dispersal, and**  
423 **abrogation of planktonic growth in diverse fungi by alexidine dihydrochloride**  
424 **(AXD):** A) Fungal cells were allowed to form a biofilm for 48 h and treated for 24 h with  
425 10  $\mu$ M AXD. Biofilm inhibition was as determined by XTT reading (OD490). B) Fungal  
426 yeast cells or spores were incubated under different concentrations of AXD under  
427 planktonic conditions. Inhibition of growth and filamentation of the fungi visualized by  
428 phase contrast microscopy (20X magnification), at their respective AXD MIC80  
429 concentrations. C) *C. albicans* planktonic hyphae (top two panels) and biofilms (bottom  
430 two panels) were treated for 12 h with 150 ng/ml of AXD. AXD inhibited lateral yeast  
431 production from hyphal cells and hyphal layers of biofilms, as visualized microscopically.  
432 Arrows point to lateral yeasts.

433 **Figure 2. Toxicity of AXD on host cells, and on biofilm killing in combination with**  
434 **fluconazole.** Different concentrations of AXD were incubated with HUVEC (A), lung

435 A549 (B), or macrophages (C) for 24 h at 37<sup>o</sup>C, for testing the CC50 of the drug to the  
436 respective cell lines. (D) *C. albicans* biofilms were developed for 48 h and then treated  
437 with different concentrations of AXD and fluconazole in a checkerboard format.  
438 Metabolic activity of biofilm cells were measured by the XTT assay. Bright red  
439 represents growth above the MIC<sub>50</sub>, dull red represents growth at the MIC<sub>50</sub>, and  
440 black/dark red represents growth below the MIC<sub>50</sub>.

441

442 **Figure 3. Impact of AXD, fluconazole (FLC) and caspofungin (CAS) as lock**  
443 **therapy against *C. albicans* biofilm cells in an in vivo catheter model.** (A) Biofilms  
444 were grown for 24 h followed by intraluminal drug treatment for 24 h. Following  
445 compound exposure, the catheters were removed for microscopy and CFU  
446 enumeration. Each of the four panels represent a 40× magnification under phase  
447 contrast microscope. Panel columns: no drug treatment (ND): control biofilm treated  
448 with saline; FLC, 125-µg/ml fluconazole exposure; AXD, catheters exposed to AXD at 3  
449 µg/ml; CAS, catheters exposed to 0.25 µg/ml caspofungin. (B) Post ND or drug  
450 treatment, catheters were cut into pieces, vortexed and sonicated to release adhered  
451 cells in sterile PBS and dilutions of the suspension were plated on solid media for CFU  
452 enumeration. Results are presented as percent biofilm reduction in drug-treated  
453 catheters compared to the untreated catheter-biofilms, and analyzed statistically by  
454 using a non-parametric t-test. P value of <0.05 is significant.

455

456 **S1:** Primary screening: MIC80 of alexidine dihydrochloride and thimerosal against pre-  
457 formed biofilms of three different fungi as determined by XTT reading (OD490). Both  
458 drugs kill biofilm cells at <10  $\mu$ M concentration.

459 **S2:** Inhibitory effect of AXD against pre-formed biofilms of four different fluconazole  
460 resistant *Candida* spp. AXD kills preformed biofilms between 3-6  $\mu$ g.

461 **S3A:** Chemical structure of Alexidine dihydrochloride

462 **S3B:** Inhibition of early cellular division of HL60 cells by AXD

463

464

465

466

467

468

469

470

471

472

473

474

475

476

477

478

479

480 **Table 1:** Table 1. Hits obtained from primary screening of the New Prestwick Chemical Library  
 481 against planktonic cells of *C. albicans*, *A.fumigatus* and *C. auris*  
 482

| <b><u>C. albicans</u></b>    | <b><u>A. fumigatus</u></b>   |
|------------------------------|------------------------------|
| Alexidine dihydrochloride    | Alexidine dihydrochloride    |
| Amphotericin B               | Butenafine Hydrochloride     |
| Antimycin A                  | Isoxsuprine hydrochloride    |
| Butenafine Hydrochloride     | Clioquinol                   |
| Chloroxine                   | Thimerosal                   |
| Ciclopirox ethanolamine      | Dequalinium dichloride       |
| Clioquinol                   | Pyrvinium pamoate            |
| Clotrimazole                 | Haloprogin                   |
| Dequalinium dichloride       | Chlorhexidine                |
| Econazole nitrate            | Voriconazole                 |
| Enilconazole                 | Amphotericin B               |
| Fluconazole                  | Antimycin A                  |
| Flucytosine                  | Econazole nitrate            |
| Haloprogin                   | Enilconazole                 |
| Isoconazole                  | Methyl benzethonium chloride |
| Isoxsuprine hydrochloride    | Tioconazole                  |
| Itraconazole                 | <b><u>C. auris</u></b>       |
| Ketoconazole                 | Alexidine dihydrochloride    |
| Methyl benzethonium chloride | Butenafine Hydrochloride     |
| Pyrvinium pamoate            | Chloroxine                   |
| Sertaconazole nitrate        | Clioquinol                   |
| Sulconazole nitrate          | Thimerosal                   |
| Terconazole                  | Haloprogin                   |
| Thimerosal                   |                              |
| Thonzonium bromide           |                              |
| Tioconazole                  |                              |
| Voriconazole                 |                              |

483 **Table 2.** MIC of AXD against clinical isolates of different fungal species, vs fluconazole or  
 484 voriconazole. Values are in µg/ml. CA=*C. albicans*, CG=*C. glabrata*, CP=*C. parapsilosis*, CK=*C.*  
 485 *krusei*, CN=*C. neoformans*, AF=*A. fumigatus*

| Isolates | Planktonic<br>Fluconazole | Planktonic<br>AXD (50%) | Planktonic<br>AXD (80%) | Biofilm inhib<br>AXD (50%) | Biofilm inhib<br>AXD (80%) | Mature<br>biofilm<br>AXD<br>(50%) | Mature<br>biofilm<br>AXD<br>(80%) |
|----------|---------------------------|-------------------------|-------------------------|----------------------------|----------------------------|-----------------------------------|-----------------------------------|
| SC5314   | <0.5                      | 0.79                    | 0.73                    | 0.73                       | 0.73                       | 3                                 | 12                                |
| CA1      | <0.125                    | 1.5                     | 1.5                     | 0.73                       | 0.73                       | 6                                 | 12                                |
| *CA2     | 16                        | 0.94                    | 0.94                    | 1.5                        | 1.5                        | 3                                 | 20                                |
| CA4      | <0.125                    | 1.5                     | 1.5                     | 0.73                       | 0.73                       | 3                                 | 12                                |
| *CA6     | 16                        | 1.5                     | 1.5                     | 1.5                        | 1.5                        | 1.5                               | 6                                 |
| *CA10    | 32                        | 1.5                     | 1.5                     | 0.73                       | 1.5                        | 3                                 | 6                                 |
| CG1      | 2                         | 0.73                    | 1.5                     | 0.73                       | 1.5                        | 3                                 | 6                                 |
| CG2      | 32                        | 0.73                    | 1.5                     | 0.15                       | 1.5                        | 3                                 | 6                                 |
| CG3      | 2                         | 0.73                    | 1.5                     | 0.73                       | 1.5                        | 3                                 | 6                                 |
| CG4      | 4                         | 1.10                    | 1.1                     | 1.5                        | 3                          | 3                                 | 6                                 |
| *CG5     | 256                       | 1.14                    | 1.14                    | 1.5                        | 3                          | 3                                 | 12                                |
| CP1      | 0.25                      | 1.5                     | 3                       | 3                          | 3                          | 3                                 | 3                                 |
| CP2      | 0.25                      | 3                       | 6                       | 3                          | 3                          | 3                                 | 6                                 |
| CP3      | 2                         | 3                       | 6                       | 3                          | 3                          | 6                                 | >12                               |
| CP4      | ≤0.12                     | 1.4                     | 1.4                     | 2.5                        | 3                          | 3                                 | 3                                 |
| *CP5     | 64                        | 2.29                    | 3                       | 4                          | 6                          | 6                                 | 6                                 |
| CK       | NA                        | 2.21                    | 3                       | 2.5                        | 6                          | 6                                 | 6                                 |
| CT1      | 2                         | 0.84                    | 0.84                    | 0.84                       | 1.5                        | 1.5                               | 3                                 |
| *CT2     | >256                      | 0.84                    | 0.84                    | 0.84                       | 1.5                        | 1.5                               | 3                                 |
| CN1      | 1                         | 0.73                    | 0.73                    | 1.5                        | 6                          | 3                                 | 6                                 |
| CN2      | 0.5                       | 0.73                    | 0.73                    | 0.73                       | 3                          | 3                                 | 3                                 |
| CN3      | 1                         | 1.5                     | 1.5                     | 1.5                        | 3                          | 1.5                               | 1.5                               |
| CAU-03   | 32                        | 0.73                    | 1.5                     | 3                          | 3                          | 3                                 | 3                                 |

|                                   |                     |      |     |      |    |    |    |
|-----------------------------------|---------------------|------|-----|------|----|----|----|
| CAU-09                            | 16                  | 1.5  | 1.5 | 6    | 6  | 3  | 6  |
|                                   | <b>Posaconazole</b> |      |     |      |    |    |    |
| <i>R. delemar</i> 99.880          | 0.25                | 1.5  | 1.5 | NT   | NT | NT | NT |
| <i>R. oryzae</i> 99.892           | 0.25                | 1.5  | 3   | NT   | NT | NT | NT |
|                                   | <b>Voriconazole</b> |      |     |      |    |    |    |
| <i>M. circinelloides</i><br>131   | 8                   | 0.73 | 3   | NT   | NT | NT | NT |
| <i>L. corymbifera</i><br>008049   | >32                 | 3    | 6   | NT   | NT | NT | NT |
| <i>C. bertholletiae</i><br>182    | 8                   | 3    | 6   | NT   | NT | NT | NT |
| <i>S. apiospermum</i><br>D116-478 | 8                   | 1.5  | 1.5 | NT   | NT | NT | NT |
| AF293                             | 0.25                | 0.73 | 3   | 0.73 | 3  | 6  | 6  |
| AF1                               | 1                   | 0.73 | 3   | 0.73 | 3  | 6  | 6  |
| AF2                               | 0.25                | 1.5  | 6   | 1.5  | 3  | 6  | 6  |
| AF3                               | 0.25                | 1.5  | 3   | 1.5  | 3  | 6  | 6  |

486

487

488

489

490

491

492

493

494

495

496

497

498



## 499   **References**

- 500   1.     Vallabhaneni S, Mody RK, Walker T, & Chiller T (2016) The Global Burden of  
501         Fungal Diseases. *Infect Dis Clin North Am* 30(1):1-11.
- 502   2.     Brown GD, *et al.* (2012) Hidden killers: human fungal infections. *Sci Transl Med*  
503         4(165):165rv113.
- 504   3.     Pappas PG, *et al.* (2010) Invasive fungal infections among organ transplant  
505         recipients: results of the Transplant-Associated Infection Surveillance Network  
506         (TRANSNET). *Clin Infect Dis* 50(8):1101-1111.
- 507   4.     Lamoth F, Lockhart SR, Berkow EL, & Calandra T (2018) Changes in the  
508         epidemiological landscape of invasive candidiasis. *J Antimicrob Chemother*  
509         73(suppl\_1):i4-i13.
- 510   5.     Brown GD, Denning DW, & Levitz SM (2012) Tackling human fungal infections.  
511         *Science* 336(6082):647.
- 512   6.     Ostrosky-Zeichner L, Casadevall A, Galgiani JN, Odds FC, & Rex JH (2010) An  
513         insight into the antifungal pipeline: selected new molecules and beyond. *Nat Rev*  
514         *Drug Discov* 9(9):719-727.
- 515   7.     Nobile CJ & Johnson AD (2015) *Candida albicans* Biofilms and Human Disease.  
516         *Annu Rev Microbiol* 69:71-92.
- 517   8.     Uppuluri P, *et al.* (2010) Dispersion as an important step in the *Candida albicans*  
518         biofilm developmental cycle. *PLoS Pathog* 6(3):e1000828.
- 519   9.     Odds FC, Brown AJ, & Gow NA (2003) Antifungal agents: mechanisms of action.  
520         *Trends Microbiol* 11(6):272-279.

- 521 10. Vandeputte P, Ferrari S, & Coste AT (2012) Antifungal resistance and new  
522 strategies to control fungal infections. *Int J Microbiol* 2012:713687.
- 523 11. Doughty-Shenton D, *et al.* (2010) Pharmacological targeting of the mitochondrial  
524 phosphatase PTPMT1. *J Pharmacol Exp Ther* 333(2):584-592.
- 525 12. Osei Sekyere J (2018) *Candida auris*: A systematic review and meta-analysis of  
526 current updates on an emerging multidrug-resistant pathogen. *Microbiologyopen*  
527 7(4):e00578.
- 528 13. Anonymous (2008) Clinical and Laboratory Standards Institute. 2008 Reference  
529 method for broth dilution antifungal susceptibility testing of yeasts; approved  
530 standard—2nd ed CLSI document M27-A3. *Clinical and Laboratory Standards*  
531 *Institute, Wayne, PA.*
- 532 14. Anonymous (2008) Clinical and Laboratory Standards Institute. 2008 Reference  
533 method for broth dilution antifungal susceptibility testing of filamentous fungi;  
534 approved standard—2nd ed CLSI document M38-A2. *Clinical and Laboratory*  
535 *Standards Institute, Wayne, PA.*
- 536 15. Zhang JH, Chung TD, & Oldenburg KR (1999) A Simple Statistical Parameter for  
537 Use in Evaluation and Validation of High Throughput Screening Assays. *J Biomol*  
538 *Screen* 4(2):67-73.
- 539 16. Wiederhold NP, *et al.* (2017) Repurposing auranofin as an antifungal: In vitro  
540 activity against a variety of medically important fungi. *Virulence* 8(2):138-142.
- 541 17. Siles SA, Srinivasan A, Pierce CG, Lopez-Ribot JL, & Ramasubramanian AK  
542 (2013) High-throughput screening of a collection of known pharmacologically

- 543 active small compounds for identification of *Candida albicans* biofilm inhibitors.  
544 *Antimicrob Agents Chemother* 57(8):3681-3687.
- 545 18. Pierce CG, *et al.* (2008) A simple and reproducible 96-well plate-based method  
546 for the formation of fungal biofilms and its application to antifungal susceptibility  
547 testing. *Nat Protoc* 3(9):1494-1500.
- 548 19. Kim HS, *et al.* (2013) Antimicrobial effect of alexidine and chlorhexidine against  
549 *Enterococcus faecalis* infection. *Int J Oral Sci* 5(1):26-31.
- 550 20. Ruiz-Linares M, Aguado-Perez B, Baca P, Arias-Moliz MT, & Ferrer-Luque CM  
551 (2017) Efficacy of antimicrobial solutions against polymicrobial root canal biofilm.  
552 *Int Endod J* 50(1):77-83.
- 553 21. Silveira LF, Baca P, Arias-Moliz MT, Rodriguez-Archilla A, & Ferrer-Luque CM  
554 (2013) Antimicrobial activity of alexidine alone and associated with N-  
555 acetylcysteine against *Enterococcus faecalis* biofilm. *Int J Oral Sci* 5(3):146-149.
- 556 22. Wiederhold NP & Lewis RE (2009) Antifungal activity against *Scedosporium*  
557 species and novel assays to assess antifungal pharmacodynamics against  
558 filamentous fungi. *Med Mycol* 47(4):422-432.
- 559 23. Uppuluri P & Lopez-Ribot JL (2016) Go Forth and Colonize: Dispersal from  
560 Clinically Important Microbial Biofilms. *PLoS Pathog* 12(2):e1005397.
- 561 24. Yip KW, *et al.* (2006) Potential use of alexidine dihydrochloride as an apoptosis-  
562 promoting anticancer agent. *Mol Cancer Ther* 5(9):2234-2240.
- 563 25. Barrios R, *et al.* (2013) Antimicrobial substantivity of alexidine and chlorhexidine  
564 in dentin. *J Endod* 39(11):1413-1415.

- 565 26. Xu S, *et al.* (2018) Biguanides enhance antifungal activity against *Candida*  
566 *glabrata*. *Virulence* 9(1):1150-1162.
- 567 27. Ganendren R, *et al.* (2004) In vitro antifungal activities of inhibitors of  
568 phospholipases from the fungal pathogen *Cryptococcus neoformans*. *Antimicrob*  
569 *Agents Chemother* 48(5):1561-1569.
- 570 28. Varadan P, *et al.* (2017) Comparison of the Antibacterial Efficacy of Alexidine  
571 and Chlorhexidine Against *Enterococcus Faecalis*: An in Vitro Study. *Cureus*  
572 9(10):e1805.
- 573 29. Douglas LJ (2003) *Candida* biofilms and their role in infection. *Trends Microbiol*  
574 11(1):30-36.
- 575 30. Uppuluri P, Nett J, Heitman J, & Andes D (2008) Synergistic effect of calcineurin  
576 inhibitors and fluconazole against *Candida albicans* biofilms. *Antimicrob Agents*  
577 *Chemother* 52(3):1127-1132.
- 578 31. Lazzell AL, *et al.* (2009) Treatment and prevention of *Candida albicans* biofilms  
579 with caspofungin in a novel central venous catheter murine model of candidiasis.  
580 *J Antimicrob Chemother* 64(3):567-570.
- 581 32. Gillum AM, Tsay EY, & Kirsch DR (1984) Isolation of the *Candida albicans* gene  
582 for orotidine-5'-phosphate decarboxylase by complementation of *S. cerevisiae*  
583 *ura3* and *E. coli pyrF* mutations. *Mol Gen Genet* 198(2):179-182.
- 584 33. Uppuluri P, Chaturvedi AK, & Lopez-Ribot JL (2009) Design of a simple model of  
585 *Candida albicans* biofilms formed under conditions of flow: development,  
586 architecture, and drug resistance. *Mycopathologia* 168(3):101-109.

- 587 34. Robbins N, *et al.* (2011) Hsp90 governs dispersion and drug resistance of fungal  
588 biofilms. *PLoS Pathog* 7(9):e1002257.
- 589 35. Jaffe EA, Nachman RL, Becker CG, & Minick CR (1973) Culture of human  
590 endothelial cells derived from umbilical veins. Identification by morphologic and  
591 immunologic criteria. *J Clin Invest* 52(11):2745-2756.
- 592 36. Ibrahim AS, *et al.* (2008) Bacterial endosymbiosis is widely present among  
593 zygomycetes but does not contribute to the pathogenesis of mucormycosis. *J*  
594 *Infect Dis* 198(7):1083-1090.
- 595 37. Chung S, Kim SH, Seo Y, Kim SK, & Lee JY (2017) Quantitative analysis of cell  
596 proliferation by a dye dilution assay: Application to cell lines and cocultures.  
597 *Cytometry A* 91(7):704-712.
- 598

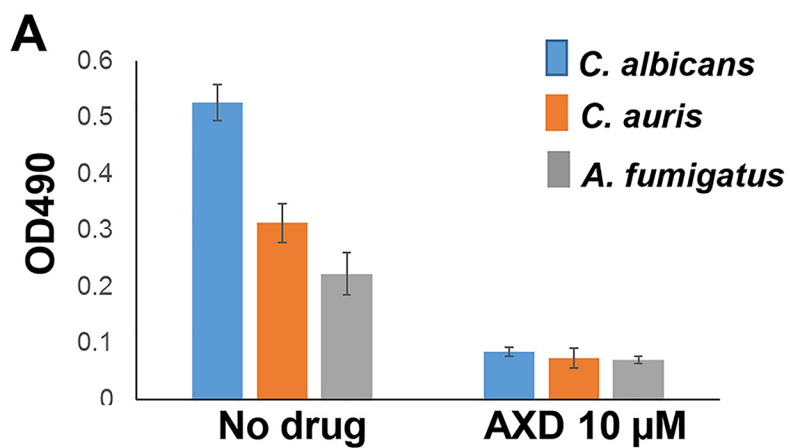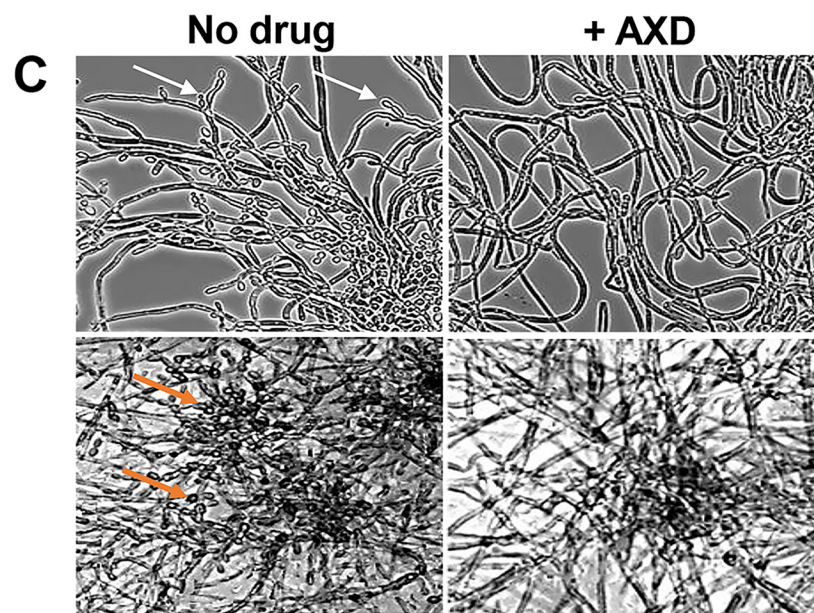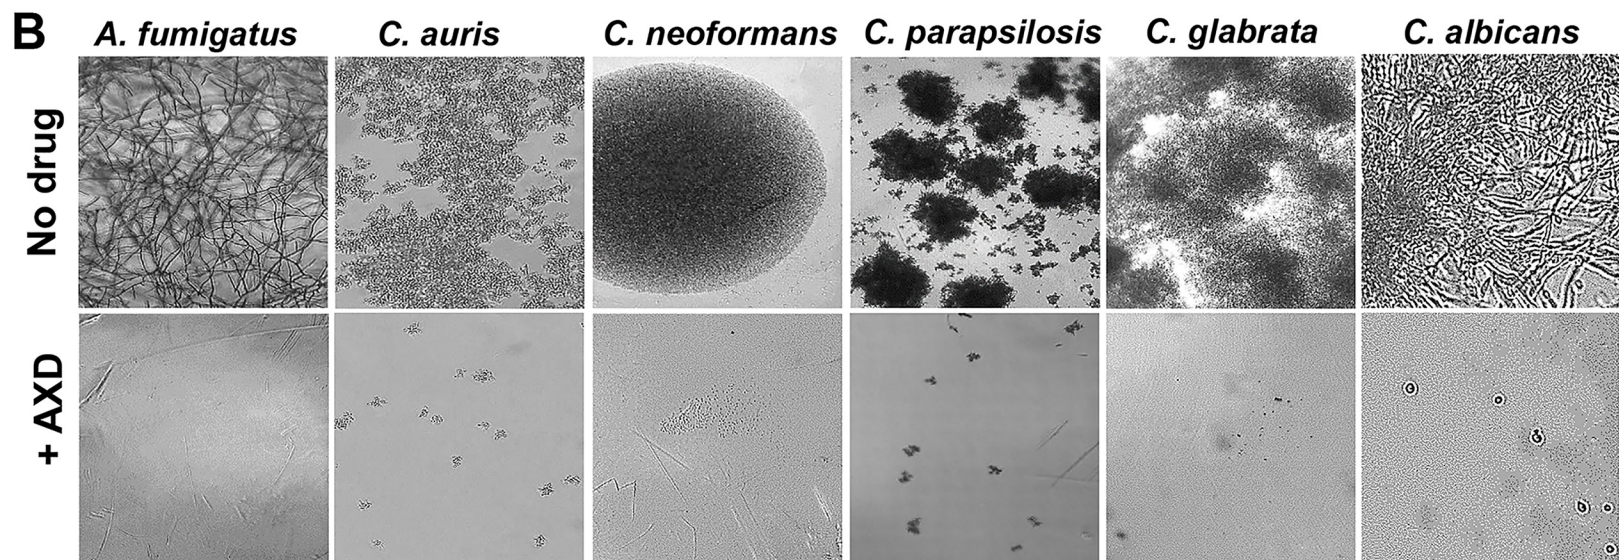

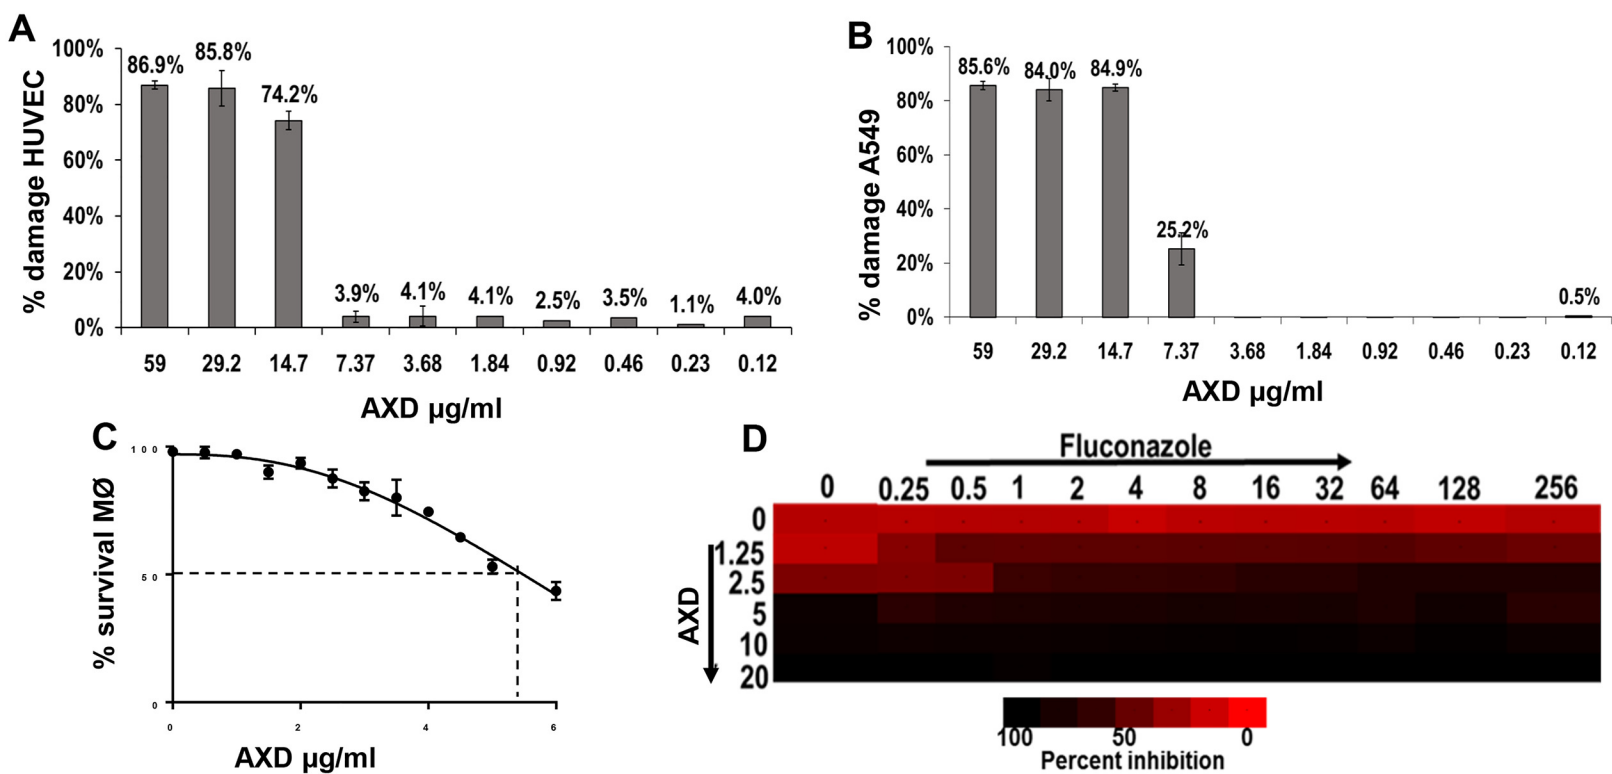

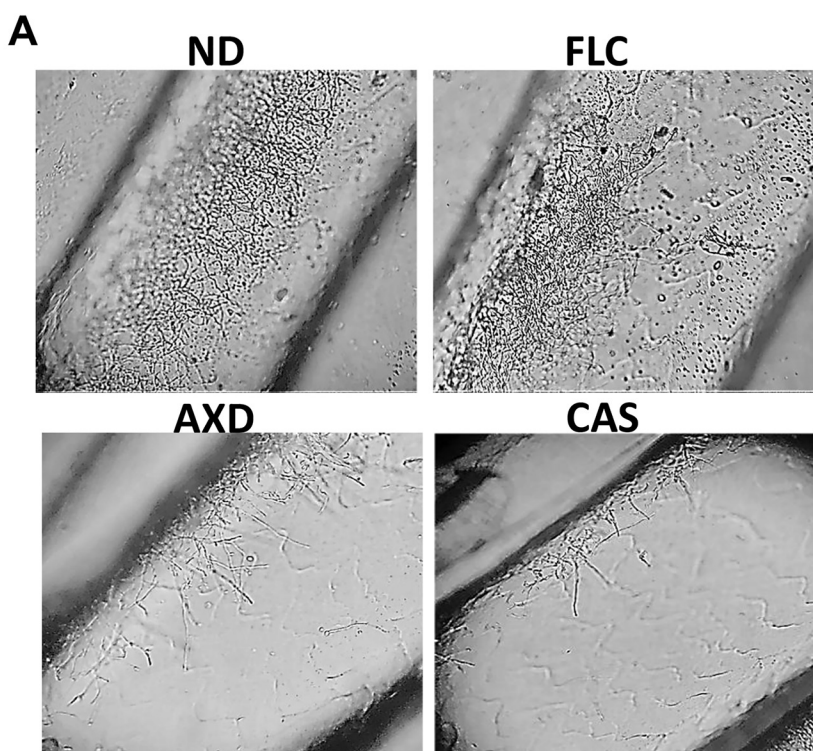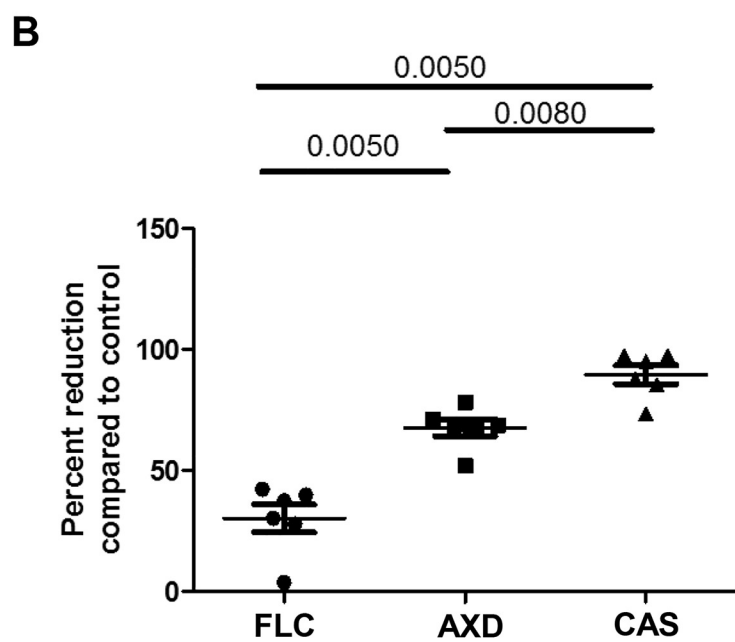

Source: https://biorxiv.org/content/biorxiv/early/2018/10/03/429944.full-text.pdf
